# Supplementary material
Source: PubMed Central journal article supplement (PMC5047356)
Supplement: NIHMS69811-supplement-Supplement.pdf [file NIHMS69811-supplement-Supplement.pdf]

## Supplementary Online Content

Sariaslan A, Lichtenstein P, Larsson H, Fazel S. Triggers for violent criminality in patients with psychotic disorders. *JAMA Psychiatry*. Published online July 13, 2016. doi:10.1001/jamapsychiatry.2016.1349.

**eTable 1.** ICD Codes

**eTable 2.** Effects of Different Definitions of Psychotic Disorders on Odds Ratios and 95% CIs for Violent Crime Occurring in the Week Following Exposure to a Trigger Compared to Control Periods Across Psychotic Disorders and Controls

**eTable 3.** Odds Ratios and 95% CIs for Violent Crime Occurring Across Three Contiguous Weekly Periods Following Exposure to Triggers Compared to Control Periods Across Psychotic Disorders and Controls

**eTable 4.** Effect Moderation by Sociodemographic Factors for the Within-Individual Effect of Violent Victimization on Violent Offending in the Week Following Exposure Compared to Control Periods Across Psychotic Disorders and Controls

**eTable 5.** Effect Moderation by Sociodemographic Factors for the Within-Individual Effect of Traumatic Brain Injury on Violent Offending in the Week Following Exposure Compared to Control Periods Across Psychotic Disorders and Controls

**eTable 6.** Effect Moderation by Sociodemographic Factors for the Within-Individual Effect of Self-Harm on Violent Offending in the Week Following Exposure Compared to Control Periods Across Psychotic Disorders and Controls

**eTable 7.** Effect Moderation by Sociodemographic Factors for the Within-Individual Effect of Unintentional Injury on Violent Offending in the Week Following Exposure Compared to Control Periods Across Psychotic Disorders And Controls

**eTable 8.** Effect Moderation by Sociodemographic Factors for the Within-Individual Effect of Substance Intoxication on Violent Offending in the Week Following Exposure Compared to Control Periods Across Psychotic Disorders and Controls

**eTable 9.** Effect Moderation by Sociodemographic Factors for the Within-Individual Effect of Parental Bereavement on Violent Offending in the Week Following Exposure Compared to Control Periods Across Psychotic Disorders and Controls

**eTable 10.** Effects of Measured Covariates on Odds ratios and 95% CIs for Violent Crime Occurring in the Week Following Exposure to a Trigger Compared to Control Periods Across Psychotic Disorders and Controls

This supplementary material has been provided by the authors to give readers additional information about their work.

**eTable 1. ICD Codes**

|                                                             | <b>ICD-8<br/>(1973-1986)</b>         | <b>ICD-9<br/>(1987-1996)</b>             | <b>ICD-10<br/>(1997-)</b>                                                                                                                                 |
|-------------------------------------------------------------|--------------------------------------|------------------------------------------|-----------------------------------------------------------------------------------------------------------------------------------------------------------|
| <b>Psychiatric disorders</b>                                |                                      |                                          |                                                                                                                                                           |
| Schizophrenia spectrum disorders                            | 295, 297-299                         | 295, 297-298                             | F20-F29                                                                                                                                                   |
| Schizophrenia only                                          | 295                                  | 295                                      | F20                                                                                                                                                       |
| Bipolar disorder                                            | 296 [excluding 295, 296.2]           | 296 [excluding 295, 296B]                | F30-F31 [excluding F20]                                                                                                                                   |
| Any psychiatric disorder (excluding substance use disorder) | 290-315 [excluding 291-292, 303-304] | 290-319 [excluding 291, 303, 305A, 305X] | F00-F99 [excluding F10-F12, F14-F16, F19]                                                                                                                 |
| <b>Triggers</b>                                             |                                      |                                          |                                                                                                                                                           |
| Self-harm                                                   |                                      |                                          | X60-X84, Y10-Y34                                                                                                                                          |
| Violent victimisation                                       |                                      |                                          | X85-X99, Y00-Y09                                                                                                                                          |
| Unintentional injury                                        |                                      |                                          | V00-V99, W00-W99, X00-X59                                                                                                                                 |
| Traumatic brain injury                                      |                                      |                                          | S01, S02.0-S02.3, S02.7-S02.9, S04, S06.0-S06.9, S07.0-S07.1, S07.8-S07.9, S09.7-S09.9, T01.0, T02.0, T04.0, T06.0, T90.1-T90.2, T90.4-T90.5, T90.8-T90.9 |
| Substance use intoxication                                  |                                      |                                          | F10.0-F12.0, F14.0-F16.0, F19.0                                                                                                                           |

**eTable 2. Effects of Different Definitions of Psychotic Disorders on Odds Ratios and 95% CIs for Violent Crime Occurring in the Week Following Exposure to a Trigger Compared to Control Periods Across Psychotic Disorders and Controls**

|                                  | <b>At least one diagnosis</b> | <b>At least two diagnoses</b> |
|----------------------------------|-------------------------------|-------------------------------|
|                                  | <b>OR [95% CI]</b>            | <b>OR [95% CI]</b>            |
| <b>Violent victimisation</b>     |                               |                               |
| Schizophrenia spectrum disorders | 12.7 [8.2; 19.6]              | 9.9 [6.0; 16.5]               |
| Schizophrenia only               | 8.6 [3.6; 20.5]               | 12.5 [4.7; 33.1]              |
| Bipolar disorder                 | 7.6 [4.0; 14.4]               | 6.4 [3.0; 13.7]               |
| <b>Traumatic brain injury</b>    |                               |                               |
| Schizophrenia spectrum disorders | 6.0 [4.0; 9.1]                | 6.4 [4.0; 10.3]               |
| Schizophrenia only               | 4.3 [1.7; 10.9]               | 6.9 [2.4; 20.1]               |
| Bipolar disorder                 | 4.2 [2.1; 8.5]                | 3.9 [1.7; 8.8]                |
| <b>Self-harm</b>                 |                               |                               |
| Schizophrenia spectrum disorders | 4.2 [2.7; 6.6]                | 4.4 [2.6; 7.4]                |
| Schizophrenia only               | 5.1 [2.3; 11.6]               | 7.1 [2.6; 19.0]               |
| Bipolar disorder                 | 4.2 [2.2; 7.8]                | 3.3 [1.4; 7.5]                |
| <b>Unintentional injury</b>      |                               |                               |
| Schizophrenia spectrum disorders | 4.8 [3.5; 6.6]                | 4.3 [3.0; 6.3]                |
| Schizophrenia only               | 4.3 [2.5; 7.6]                | 5.5 [3.0; 10.3]               |
| Bipolar disorder                 | 5.8 [3.6; 9.2]                | 5.0 [2.9; 8.6]                |
| <b>Substance intoxication</b>    |                               |                               |
| Schizophrenia spectrum disorders | 3.0 [2.1; 4.3]                | 1.8 [1.1; 3.0]                |
| Schizophrenia only               | 2.8 [1.4; 5.6]                | 2.7 [1.1; 6.4]                |
| Bipolar disorder                 | 4.0 [2.3; 7.0]                | 4.8 [2.6; 9.0]                |
| <b>Parental bereavement</b>      |                               |                               |
| Schizophrenia spectrum disorders | 5.0 [3.0; 8.1]                | 5.1 [2.9; 9.0]                |
| Schizophrenia only               | 5.7 [2.8; 11.6]               | 4.0 [1.8; 9.0]                |
| Bipolar disorder                 | 3.6 [1.2; 10.6]               | 4.6 [1.5; 13.9]               |

Notes: All models adjusted for age, calendar month, single status, low educational attainment, frequent residential relocations, low family income, residence in deprived neighbourhoods and being the recipient of unemployment, social assistance or disability pension benefits.

**eTable 3. Odds Ratios and 95% CIs for Violent Crime Occurring Across Three Contiguous Weekly Periods Following Exposure to Triggers Compared to Control Periods Across Psychotic Disorders and Controls**

|                                  | <b>Week I</b>      | <b>Week II</b>     | <b>Week III</b>    |
|----------------------------------|--------------------|--------------------|--------------------|
|                                  | <b>OR [95% CI]</b> | <b>OR [95% CI]</b> | <b>OR [95% CI]</b> |
| <b>Violent victimisation</b>     |                    |                    |                    |
| Schizophrenia spectrum disorders | 12.7 [8.2; 19.6]   | 0.8 [0.4; 2.0]     | 1.1 [0.5; 2.3]     |
| Bipolar disorder                 | 7.6 [4.0; 14.4]    | 1.3 [0.4; 4.1]     | 1.6 [0.5; 4.9]     |
| Controls                         | 8.1 [7.0; 9.3]     | 0.9 [0.7; 1.2]     | 1.1 [0.9; 1.5]     |
| <b>Traumatic brain injury</b>    |                    |                    |                    |
| Schizophrenia spectrum disorders | 6.0 [4.0; 9.1]     | 1.5 [0.8; 2.9]     | 0.7 [0.3; 1.7]     |
| Bipolar disorder                 | 4.2 [2.1; 8.5]     | 2.0 [0.7; 6.0]     | 2.1 [0.7; 5.9]     |
| Controls                         | 6.7 [5.9; 7.7]     | 1.2 [0.9; 1.5]     | 1.1 [0.8; 1.4]     |
| <b>Self-harm</b>                 |                    |                    |                    |
| Schizophrenia spectrum disorders | 4.2 [2.7; 6.6]     | 1.2 [0.6; 2.2]     | 1.4 [0.7; 2.7]     |
| Bipolar disorder                 | 4.2 [2.2; 7.8]     | 2.0 [0.8; 4.8]     | 0.9 [0.3; 2.5]     |
| Controls                         | 3.9 [3.2; 4.7]     | 1.6 [1.2; 2.1]     | 1.0 [0.7; 1.4]     |
| <b>Unintentional injury</b>      |                    |                    |                    |
| Schizophrenia spectrum disorders | 4.8 [3.5; 6.6]     | 1.8 [1.2; 2.8]     | 1.1 [0.7; 1.8]     |
| Bipolar disorder                 | 5.8 [3.6; 9.2]     | 1.3 [0.6; 2.9]     | 1.0 [0.5; 2.1]     |
| Controls                         | 3.5 [3.2; 4.0]     | 1.2 [1.0; 1.4]     | 1.1 [1.0; 1.3]     |
| <b>Substance intoxication</b>    |                    |                    |                    |
| Schizophrenia spectrum disorders | 3.0 [2.1; 4.3]     | 2.3 [1.6; 3.5]     | 1.5 [0.9; 2.5]     |
| Bipolar disorder                 | 4.0 [2.3; 7.0]     | 1.7 [0.8; 3.6]     | 2.5 [1.3; 4.7]     |
| Controls                         | 3.4 [2.9; 4.0]     | 1.8 [1.4; 2.2]     | 1.3 [1.0; 1.6]     |
| <b>Parental bereavement</b>      |                    |                    |                    |
| Schizophrenia spectrum disorders | 5.0 [3.0; 8.1]     | 1.1 [0.5; 2.8]     | 1.1 [0.4; 2.8]     |
| Bipolar disorder                 | 3.6 [1.2; 10.6]    | NC                 | 1.4 [0.3; 5.9]     |
| Controls                         | 1.7 [1.3; 2.2]     | 1.1 [0.7; 1.5]     | 1.3 [0.9; 1.8]     |

Notes: Within-individual estimates adjusted for age, calendar month, single status, low educational attainment, frequent residential relocations, low family income, residence in deprived neighbourhoods and being the recipient of unemployment, social assistance or disability pension benefits. NC = model did not converge.

**eTable 4. Effect Moderation by Sociodemographic Factors for the Within-Individual Effect of Violent Victimization on Violent Offending in the Week Following Exposure Compared to Control Periods Across Psychotic Disorders and Controls**

|                                  | Schizophrenia spectrum disorders |                      |                           | Bipolar disorder   |                      |                           | Unaffected controls |                     |                           |
|----------------------------------|----------------------------------|----------------------|---------------------------|--------------------|----------------------|---------------------------|---------------------|---------------------|---------------------------|
|                                  | Unexposed                        | Exposed              | <i>P</i><br>(Interaction) | Unexposed          | Exposed              | <i>P</i><br>(Interaction) | Unexposed           | Exposed             | <i>P</i><br>(Interaction) |
|                                  | OR [95% CI]                      | OR [95% CI]          |                           | OR [95% CI]        | OR [95% CI]          |                           | OR [95% CI]         | OR [95% CI]         |                           |
| Disability pension               | 15.2<br>[8.8; 26.3]              | 9.1<br>[4.2; 19.6]   | .636                      | 6.4<br>[3.2; 13.0] | 26.8<br>[3.6; 198.5] | .899                      | 8.5<br>[7.4; 9.9]   | 5.0<br>[3.2; 7.8]   | .024                      |
| Welfare benefits                 | 13.4<br>[6.9; 26.1]              | 13.6<br>[7.3; 25.4]  | .295                      | 8.4<br>[3.5; 20.1] | 9.6<br>[3.1; 29.4]   | .765                      | 11.0<br>[9.1; 13.2] | 5.2<br>[4.2; 6.5]   | 6.2 * 10 <sup>-12</sup>   |
| Frequent residential relocations | 13.1<br>[8.3; 20.6]              | 13.5<br>[0.8; 234.4] | .441                      | 8.4<br>[4.3; 16.5] | NC                   | .400                      | 8.4<br>[7.2; 9.7]   | 6.7<br>[3.7; 11.9]  | .085                      |
| Unemployment benefits            | 11.8<br>[7.4; 18.7]              | 27.9<br>[5.8; 132.9] | .711                      | 8.1<br>[4.1; 16.1] | 6.9<br>[0.8; 62.5]   | .543                      | 7.4<br>[6.4; 8.7]   | 12.2<br>[8.5; 17.7] | .005                      |
| Single                           | 9.5<br>[0.6; 146.2]              | 12.8<br>[8.1; 20.1]  | .791                      | NC                 | 7.1<br>[3.7; 13.6]   | .848                      | 9.8<br>[5.2; 18.6]  | 8.0<br>[6.9; 9.2]   | .255                      |
| Low income                       | 10.7<br>[5.9; 19.4]              | 14.1<br>[7.0; 28.5]  | .653                      | 9.1<br>[4.0; 20.8] | 12.4<br>[3.0; 51.6]  | .916                      | 9.1<br>[7.7; 10.8]  | 6.0<br>[4.5; 7.8]   | .001                      |
| High neighborhood deprivation    | 13.1<br>[7.9; 21.6]              | 11.8<br>[4.2; 33.2]  | .548                      | 7.3<br>[3.7; 14.7] | 7.7<br>[1.0; 56.9]   | .778                      | 8.5<br>[7.2; 10.0]  | 6.3<br>[4.7; 8.6]   | .189                      |
| Low education                    | 12.4<br>[6.5; 23.4]              | 12.2<br>[6.6; 22.5]  | .289                      | 8.1<br>[3.4; 19.0] | 7.7<br>[2.8; 20.8]   | .856                      | 11.6<br>[9.5; 14.2] | 5.7<br>[4.7; 7.0]   | 1.6 * 10 <sup>-8</sup>    |
| Age, binary (<=21 years)         | 8.8<br>[6.0; 12.9]               | 31.8<br>[8.5; 119.6] | .032                      | 5.9<br>[3.2; 11.1] | 52.1<br>[7.7; 352.1] | .049                      | 8.9<br>[7.8; 10.11] | 7.0<br>[5.4; 9.1]   | .361                      |
| Age, continuous                  |                                  |                      | .121                      |                    |                      | .215                      |                     |                     | .207                      |

Notes: All models adjusted for age, calendar month, single status, low educational attainment, frequent residential relocations, low family income, residence in deprived neighbourhoods and being the recipient of unemployment, social assistance or disability pension benefits.

**eTable 5. Effect Moderation by Sociodemographic Factors for the Within-Individual Effect of Traumatic Brain Injury on Violent Offending in the Week Following Exposure Compared to Control Periods Across Psychotic Disorders and Controls**

|                                  | Schizophrenia spectrum disorders |                    |                           | Bipolar disorder   |                      |                           | Unaffected controls |                    |                           |
|----------------------------------|----------------------------------|--------------------|---------------------------|--------------------|----------------------|---------------------------|---------------------|--------------------|---------------------------|
|                                  | Unexposed                        | Exposed            | <i>P</i><br>(Interaction) | Unexposed          | Exposed              | <i>P</i><br>(Interaction) | Unexposed           | Exposed            | <i>P</i><br>(Interaction) |
|                                  | OR [95% CI]                      | OR [95% CI]        |                           | OR [95% CI]        | OR [95% CI]          |                           | OR [95% CI]         | OR [95% CI]        |                           |
| Disability pension               | 5.8<br>[3.4; 9.7]                | 6.1<br>[3.0; 12.3] | .671                      | 5.3<br>[2.5; 11.5] | 2.7<br>[0.5; 16.2]   | .306                      | 7.0<br>[6.1; 8.1]   | 4.7<br>[3.1; 7.2]  | .024                      |
| Welfare benefits                 | 8.8<br>[4.9; 15.8]               | 3.0<br>[1.6; 5.9]  | .022                      | 5.5<br>[2.2; 13.4] | 2.9<br>[0.9; 16.2]   | .240                      | 8.1<br>[6.7; 9.7]   | 4.7<br>[3.8; 5.8]  | 2.8 * 10 <sup>-6</sup>    |
| Frequent residential relocations | 5.9<br>[3.8; 9.1]                | NC                 | .889                      | 3.6<br>[1.6; 7.8]  | NC                   | .208                      | 6.8<br>[5.9; 7.9]   | 6.3<br>[3.5; 11.2] | .335                      |
| Unemployment benefits            | 6.4<br>[4.1; 10.1]               | 4.5<br>[1.2; 16.0] | .954                      | 4.6<br>[2.1; 10.2] | 3.0<br>[0.4; 21.4]   | .866                      | 6.4<br>[5.5; 7.4]   | 8.1<br>[5.8; 11.5] | .098                      |
| Single                           | 2.9<br>[0.1; 124.4]              | 6.2<br>[4.1; 9.5]  | .524                      | NC                 | 4.4<br>[2.2; 8.8]    | .986                      | 7.8<br>[4.0; 15.4]  | 6.6<br>[5.8; 7.6]  | .356                      |
| Low income                       | 6.9<br>[3.9; 12.2]               | 4.9<br>[2.5; 9.5]  | .983                      | 6.1<br>[2.7; 13.7] | 0.7<br>[0.1; 8.7]    | .068                      | 7.0<br>[6.0; 8.3]   | 6.1<br>[4.8; 7.9]  | .034                      |
| High neighborhood deprivation    | 5.7<br>[3.5; 9.2]                | 7.7<br>[3.1; 19.5] | .386                      | 3.8<br>[1.7; 8.3]  | 2.8<br>[0.5; 16.1]   | .764                      | 7.2<br>[6.2; 8.3]   | 5.0<br>[3.7; 6.9]  | .118                      |
| Low education                    | 7.2<br>[4.0; 12.8]               | 5.2<br>[2.9; 9.6]  | .412                      | 2.8<br>[1.1; 7.5]  | 5.9<br>[2.1; 17.0]   | .189                      | 9.5<br>[7.8; 11.5]  | 4.8<br>[4.0; 5.9]  | 3.8 * 10 <sup>-6</sup>    |
| Age, binary (<=21 years)         | 6.0<br>[4.1; 8.9]                | 7.2<br>[2.3; 23.0] | .818                      | 4.0<br>[2.0; 8.0]  | 42.0<br>[2.8; 635.7] | .446                      | 7.2<br>[6.3; 8.2]   | 5.0<br>[3.9; 6.5]  | .017                      |
| Age, continuous                  |                                  |                    | .709                      |                    |                      | .042                      |                     |                    | .848                      |

Notes: All models adjusted for age, calendar month, single status, low educational attainment, frequent residential relocations, low family income, residence in deprived neighbourhoods and being the recipient of unemployment, social assistance or disability pension benefits.

**eTable 6. Effect Moderation by Sociodemographic Factors for the Within-Individual Effect of Self-Harm on Violent Offending in the Week Following Exposure Compared to Control Periods Across Psychotic Disorders and Controls**

|                                  | Schizophrenia spectrum disorders |                    |                           | Bipolar disorder   |                     |                           | Unaffected controls |                   |                           |
|----------------------------------|----------------------------------|--------------------|---------------------------|--------------------|---------------------|---------------------------|---------------------|-------------------|---------------------------|
|                                  | Unexposed                        | Exposed            | <i>P</i><br>(Interaction) | Unexposed          | Exposed             | <i>P</i><br>(Interaction) | Unexposed           | Exposed           | <i>P</i><br>(Interaction) |
|                                  | OR [95% CI]                      | OR [95% CI]        |                           | OR [95% CI]        | OR [95% CI]         |                           | OR [95% CI]         | OR [95% CI]       |                           |
| Disability pension               | 4.0<br>[2.3; 7.0]                | 4.4<br>[2.0; 9.5]  | .735                      | 4.1<br>[1.9; 8.6]  | 3.6<br>[0.7; 17.5]  | .417                      | 4.0<br>[3.2; 4.9]   | 3.5<br>[2.1; 5.9] | .423                      |
| Welfare benefits                 | 6.1<br>[3.1; 12.0]               | 3.2<br>[1.7; 6.0]  | .596                      | 3.9<br>[1.4; 11.4] | 3.9<br>[1.6; 9.7]   | .707                      | 4.0<br>[3.0; 5.3]   | 3.8<br>[2.9; 5.0] | .807                      |
| Frequent residential relocations | 4.4<br>[2.8; 7.0]                | NC                 | .988                      | 4.2<br>[2.1; 8.2]  | NC                  | .507                      | 4.0<br>[3.0; 4.9]   | 3.4<br>[1.6; 7.5] | .468                      |
| Unemployment benefits            | 4.3<br>[2.6; 7.0]                | 5.6<br>[1.5; 20.4] | .987                      | 4.4<br>[2.2; 9.1]  | 3.7<br>[0.6; 24.2]  | .952                      | 4.0<br>[3.2; 5.0]   | 3.7<br>[2.2; 6.3] | .699                      |
| Single                           | NC                               | 4.4<br>[2.9; 6.9]  | .980                      | 4.7<br>[0.3; 84.4] | 3.6<br>[1.8; 7.0]   | .923                      | 1.2<br>[0.4; 3.5]   | 4.1<br>[3.4; 5.1] | .038                      |
| Low income                       | 4.2<br>[2.4; 7.5]                | 3.3<br>[1.6; 6.8]  | .718                      | 4.2<br>[1.9; 9.2]  | 4.9<br>[1.2; 20.1]  | .148                      | 3.6<br>[2.8; 4.6]   | 4.6<br>[3.3; 6.4] | .111                      |
| High neighborhood deprivation    | 4.2<br>[2.5; 7.1]                | 5.8<br>[2.4; 14.1] | .292                      | 4.7<br>[2.3; 9.4]  | 1.4<br>[0.2; 11.5]  | .168                      | 4.1<br>[3.3; 5.1]   | 3.7<br>[2.3; 5.9] | .303                      |
| Low education                    | 5.9<br>[3.2; 10.8]               | 2.9<br>[1.5; 5.7]  | .077                      | 3.7<br>[1.4; 9.7]  | 5.1<br>[1.9; 13.2]  | .602                      | 4.0<br>[3.0; 5.4]   | 3.8<br>[3.0; 5.0] | .434                      |
| Age, binary (<=21 years)         | 5.0<br>[3.3; 7.6]                | 3.6<br>[1.0; 12.8] | .690                      | 4.6<br>[2.4; 8.7]  | 8.1<br>[0.3; 218.5] | .536                      | 4.4<br>[3.6; 5.3]   | 3.7<br>[2.4; 5.7] | .369                      |
| Age, continuous                  |                                  |                    | .608                      |                    |                     | .381                      |                     |                   | .750                      |

Notes: All models adjusted for age, calendar month, single status, low educational attainment, frequent residential relocations, low family income, residence in deprived neighbourhoods and being the recipient of unemployment, social assistance or disability pension benefits.

**eTable 7. Effect Moderation by Sociodemographic Factors for the Within-Individual Effect of Unintentional Injury on Violent Offending in the Week Following Exposure Compared to Control Periods Across Psychotic Disorders And Controls**

|                                  | Schizophrenia spectrum disorders |                    |                           | Bipolar disorder    |                     |                           | Unaffected controls |                   |                           |
|----------------------------------|----------------------------------|--------------------|---------------------------|---------------------|---------------------|---------------------------|---------------------|-------------------|---------------------------|
|                                  | Unexposed                        | Exposed            | <i>P</i><br>(Interaction) | Unexposed           | Exposed             | <i>P</i><br>(Interaction) | Unexposed           | Exposed           | <i>P</i><br>(Interaction) |
|                                  | OR [95% CI]                      | OR [95% CI]        |                           | OR [95% CI]         | OR [95% CI]         |                           | OR [95% CI]         | OR [95% CI]       |                           |
| Disability pension               | 4.8<br>[3.2; 7.0]                | 3.9<br>[2.2; 7.0]  | .621                      | 5.5<br>[3.2; 9.5]   | 6.1<br>[2.0; 18.2]  | .966                      | 3.5<br>[3.1; 3.9]   | 4.1<br>[2.9; 5.8] | .193                      |
| Welfare benefits                 | 6.3<br>[4.0; 10.0]               | 3.5<br>[2.2; 5.6]  | .146                      | 5.8<br>[3.1; 10.8]  | 6.0<br>[2.7; 13.3]  | .268                      | 3.6<br>[3.1; 4.2]   | 3.3<br>[2.7; 3.9] | .596                      |
| Frequent residential relocations | 4.9<br>[3.5; 6.9]                | 3.3<br>[0.6; 17.6] | .283                      | 6.1<br>[3.8; 10.0]  | 6.5<br>[0.4; 110.3] | .363                      | 3.5<br>[3.1; 3.9]   | 3.9<br>[2.5; 6.2] | .971                      |
| Unemployment benefits            | 4.3<br>[3.0; 6.1]                | 6.0<br>[2.5; 14.2] | .090                      | 5.6<br>[3.3; 9.5]   | 8.1<br>[2.3; 28.3]  | .737                      | 3.5<br>[3.1; 4.0]   | 3.4<br>[2.6; 4.5] | .710                      |
| Single                           | 1.0<br>[0.1; 10.7]               | 5.0<br>[3.6; 6.9]  | .403                      | 19.0<br>[4.0; 89.3] | 5.5<br>[3.3; 9.1]   | .096                      | 4.0<br>[2.5; 6.1]   | 3.5<br>[3.1; 3.9] | .284                      |
| Low income                       | 4.9<br>[3.3; 7.5]                | 3.7<br>[2.1; 6.4]  | .552                      | 6.8<br>[3.9; 11.6]  | 6.5<br>[1.9; 22.7]  | .158                      | 3.5<br>[3.1; 4.0]   | 3.4<br>[2.8; 4.3] | .937                      |
| High neighborhood deprivation    | 5.1<br>[3.5; 7.4]                | 3.3<br>[1.8; 6.3]  | .619                      | 4.6<br>[2.7; 7.8]   | 19.4<br>[4.9; 77.5] | .401                      | 3.4<br>[3.0; 3.9]   | 3.8<br>[2.9; 4.8] | .924                      |
| Low education                    | 5.6<br>[3.5; 8.9]                | 4.3<br>[2.7; 6.7]  | .649                      | 5.6<br>[3.0; 10.4]  | 5.6<br>[2.7; 11.7]  | .970                      | 4.2<br>[3.5; 4.9]   | 3.1<br>[2.6; 3.6] | .046                      |
| Age, binary (<=21 years)         | 4.2<br>[3.1; 5.6]                | 3.6<br>[1.6; 8.3]  | .967                      | 4.9<br>[3.2; 7.6]   | 7.5<br>[2.6; 21.7]  | .419                      | 3.3<br>[3.0; 3.7]   | 2.5<br>[2.0; 3.1] | .078                      |
| Age, continuous                  |                                  |                    | .074                      |                     |                     | .882                      |                     |                   | .657                      |

Notes: All models adjusted for age, calendar month, single status, low educational attainment, frequent residential relocations, low family income, residence in deprived neighbourhoods and being the recipient of unemployment, social assistance or disability pension benefits.



**eTable 8. Effect Moderation by Sociodemographic Factors for the Within-Individual Effect of Substance Intoxication on Violent Offending in the Week Following Exposure Compared to Control Periods Across Psychotic Disorders and Controls**

|                                  | Schizophrenia spectrum disorders |                    |                           | Bipolar disorder   |                    |                           | Unaffected controls |                   |                           |
|----------------------------------|----------------------------------|--------------------|---------------------------|--------------------|--------------------|---------------------------|---------------------|-------------------|---------------------------|
|                                  | Unexposed                        | Exposed            | <i>P</i><br>(Interaction) | Unexposed          | Exposed            | <i>P</i><br>(Interaction) | Unexposed           | Exposed           | <i>P</i><br>(Interaction) |
|                                  | OR [95% CI]                      | OR [95% CI]        |                           | OR [95% CI]        | OR [95% CI]        |                           | OR [95% CI]         | OR [95% CI]       |                           |
| Disability pension               | 2.4<br>[1.5; 4.0]                | 3.5<br>[2.1; 5.8]  | .376                      | 3.4<br>[1.6; 7.3]  | 4.6<br>[1.9; 10.9] | .329                      | 3.6<br>[3.0; 4.3]   | 2.8<br>[1.9; 3.9] | .114                      |
| Welfare benefits                 | 4.5<br>[2.7; 7.2]                | 1.6<br>[0.9; 2.9]  | .001                      | 6.0<br>[2.8; 12.8] | 3.3<br>[1.3; 8.1]  | .239                      | 3.7<br>[2.9; 4.7]   | 2.8<br>[2.2; 3.5] | .002                      |
| Frequent residential relocations | 3.1<br>[2.1; 4.4]                | 2.1<br>[0.4; 10.6] | .714                      | 4.3<br>[2.4; 7.6]  | 4.4<br>[0.2; 84.5] | .891                      | 3.5<br>[3.0; 4.2]   | 3.4<br>[1.8; 6.5] | .409                      |
| Unemployment benefits            | 3.0<br>[2.0; 4.4]                | 3.5<br>[1.0; 12.1] | .537                      | 4.3<br>[2.4; 7.6]  | NC                 | .985                      | 3.3<br>[2.7; 3.9]   | 3.8<br>[2.5; 5.8] | .085                      |
| Single                           | NC                               | 3.1<br>[2.2; 4.4]  | .985                      | NC                 | 4.7<br>[2.7; 8.2]  | .980                      | 2.4<br>[1.1; 4.9]   | 3.5<br>[2.9; 4.1] | .629                      |
| Low income                       | 2.3<br>[1.3; 4.0]                | 3.8<br>[2.4; 6.1]  | .132                      | 2.6<br>[1.2; 5.9]  | 6.7<br>[2.8; 16.2] | .082                      | 3.4<br>[2.7; 4.2]   | 3.3<br>[2.6; 4.3] | .811                      |
| High neighborhood deprivation    | 2.8<br>[1.9; 4.2]                | 4.0<br>[1.8; 8.7]  | .606                      | 5.8<br>[3.3; 10.3] | NC                 | .983                      | 3.8<br>[3.2; 4.5]   | 2.0<br>[1.3; 3.1] | .007                      |
| Low education                    | 2.5<br>[1.4; 4.5]                | 3.4<br>[2.2; 5.3]  | .319                      | 3.3<br>[1.4; 7.9]  | 4.9<br>[2.3; 10.4] | .328                      | 3.8<br>[3.0; 4.8]   | 3.2<br>[2.5; 3.9] | .260                      |
| Age, binary (<=21 years)         | 3.1<br>[2.2; 4.5]                | 2.6<br>[0.6; 12.5] | .925                      | 4.0<br>[2.3; 7.0]  | NC                 | .979                      | 3.6<br>[3.1; 4.3]   | 2.8<br>[1.7; 4.6] | .232                      |
| Age, continuous                  |                                  |                    | .500                      |                    |                    | .580                      |                     |                   | .001                      |

Notes: All models adjusted for age, calendar month, single status, low educational attainment, frequent residential relocations, low family income, residence in deprived neighbourhoods and being the recipient of unemployment, social assistance or disability pension benefits.

**eTable 9. Effect Moderation by Sociodemographic Factors for the Within-Individual Effect of Parental Bereavement on Violent Offending in the Week Following Exposure Compared to Control Periods Across Psychotic Disorders and Controls**

|                                  | Schizophrenia spectrum disorders |                    |                           | Bipolar disorder   |                    |                           | Unaffected controls |                   |                           |
|----------------------------------|----------------------------------|--------------------|---------------------------|--------------------|--------------------|---------------------------|---------------------|-------------------|---------------------------|
|                                  | Unexposed                        | Exposed            | <i>P</i><br>(Interaction) | Unexposed          | Exposed            | <i>P</i><br>(Interaction) | Unexposed           | Exposed           | <i>P</i><br>(Interaction) |
|                                  | OR [95% CI]                      | OR [95% CI]        |                           | OR [95% CI]        | OR [95% CI]        |                           | OR [95% CI]         | OR [95% CI]       |                           |
| Disability pension               | 3.7<br>[1.7; 8.0]                | 5.8<br>[2.9; 11.9] | .520                      | 4.7<br>[1.3; 16.8] | 1.4<br>[0.1; 12.9] | .575                      | 1.6<br>[1.1; 2.1]   | 2.3<br>[1.3; 4.3] | .258                      |
| Welfare benefits                 | 5.3<br>[2.6; 10.5]               | 3.8<br>[1.6; 8.8]  | .510                      | 1.9<br>[0.2; 16.1] | 6.8<br>[1.6; 28.9] | .298                      | 1.6<br>[1.1; 2.4]   | 1.8<br>[1.2; 2.7] | .892                      |
| Frequent residential relocations | 5.4<br>[3.2; 8.9]                | NC                 | .984                      | 4.2<br>[1.4; 12.5] | 4.3<br>[1.4; 12.6] | .987                      | 1.6<br>[1.2; 2.2]   | 2.4<br>[0.8; 7.3] | .641                      |
| Unemployment benefits            | 4.6<br>[2.7; 8.0]                | 6.8<br>[1.3; 34.9] | .542                      | 3.3<br>[0.9; 11.5] | 3.2<br>[0.2; 44.3] | .724                      | 1.6<br>[1.1; 2.2]   | 2.1<br>[1.1; 3.9] | .341                      |
| Single                           | 1.5<br>[0.1; 22.9]               | 5.2<br>[3.1; 8.7]  | .886                      | NC                 | 4.2<br>[1.4; 12.7] | .983                      | 1.5<br>[0.7; 3.6]   | 1.7<br>[1.3; 2.3] | .978                      |
| Low income                       | 4.9<br>[2.6; 9.4]                | 4.2<br>[1.8; 10.3] | .498                      | 2.6<br>[0.7; 9.3]  | 6.1<br>[0.4; 95.5] | .771                      | 1.8<br>[1.3; 2.6]   | 1.3<br>[0.8; 2.2] | .441                      |
| High neighborhood deprivation    | 5.9<br>[3.3; 10.3]               | 2.6<br>[0.7; 9.4]  | .085                      | 4.8<br>[1.6; 14.5] | NC                 | .991                      | 1.6<br>[1.1; 2.2]   | 1.8<br>[1.0; 3.2] | .716                      |
| Low education                    | 5.3<br>[2.7; 10.1]               | 4.1<br>[1.8; 9.4]  | .454                      | 3.8<br>[1.1; 13.4] | 3.0<br>[0.3; 29.5] | .815                      | 1.6<br>[1.1; 2.4]   | 1.8<br>[1.2; 2.7] | .982                      |
| Age, binary (<=21 years)         | 4.5<br>[2.8; 7.5]                | 2.8<br>[0.2; 34.1] | .720                      | 3.3<br>[1.1; 9.3]  | NC                 | .988                      | 1.5<br>[1.1; 2.0]   | 2.2<br>[1.0; 4.8] | .198                      |
| Age, continuous                  |                                  |                    | .911                      |                    |                    | .524                      |                     |                   | .205                      |

Notes: All models adjusted for age, calendar month, single status, low educational attainment, frequent residential relocations, low family income, residence in deprived neighbourhoods and being the recipient of unemployment, social assistance or disability pension benefits.

**eTable 10. Effects of Measured Covariates on Odds ratios and 95% CIs for Violent Crime Occurring in the Week Following Exposure to a Trigger Compared to Control Periods Across Psychotic Disorders and Controls**

|                                  | <b>Model I</b>     | <b>Model II</b>    |
|----------------------------------|--------------------|--------------------|
|                                  | <b>OR [95% CI]</b> | <b>OR [95% CI]</b> |
| <b>Violent victimisation</b>     |                    |                    |
| Schizophrenia spectrum disorders | 10.9 [7.3; 16.3]   | 12.7 [8.2; 19.6]   |
| Bipolar disorder                 | 7.2 [3.9; 13.3]    | 7.6 [4.0; 14.4]    |
| Controls                         | 7.9 [6.9; 9.0]     | 8.1 [7.0; 9.3]     |
| <b>Traumatic brain injury</b>    |                    |                    |
| Schizophrenia spectrum disorders | 6.3 [4.3; 9.3]     | 6.0 [4.0; 9.1]     |
| Bipolar disorder                 | 3.8 [1.9; 7.6]     | 4.2 [2.1; 8.5]     |
| Controls                         | 6.5 [5.7; 7.3]     | 6.7 [5.9; 7.7]     |
| <b>Self-harm</b>                 |                    |                    |
| Schizophrenia spectrum disorders | 4.4 [2.9; 6.7]     | 4.2 [2.7; 6.6]     |
| Bipolar disorder                 | 4.5 [2.4; 8.4]     | 4.2 [2.2; 7.8]     |
| Controls                         | 3.8 [3.1; 4.6]     | 3.9 [3.2; 4.7]     |
| <b>Unintentional injury</b>      |                    |                    |
| Schizophrenia spectrum disorders | 5.2 [3.8; 7.0]     | 4.8 [3.5; 6.6]     |
| Bipolar disorder                 | 6.2 [4.0; 9.7]     | 5.8 [3.6; 9.2]     |
| Controls                         | 3.4 [3.1; 3.8]     | 3.5 [3.2; 4.0]     |
| <b>Substance intoxication</b>    |                    |                    |
| Schizophrenia spectrum disorders | 2.8 [2.0; 3.9]     | 3.0 [2.1; 4.3]     |
| Bipolar disorder                 | 3.7 [2.1; 6.3]     | 4.0 [2.3; 7.0]     |
| Controls                         | 3.3 [2.8; 3.8]     | 3.4 [2.9; 4.0]     |
| <b>Parental bereavement</b>      |                    |                    |
| Schizophrenia spectrum disorders | 4.5 [2.8; 7.4]     | 5.0 [3.0; 8.1]     |
| Bipolar disorder                 | 2.6 [0.9; 7.2]     | 3.6 [1.2; 10.6]    |
| Controls                         | 1.5 [1.2; 2.0]     | 1.7 [1.3; 2.2]     |

Notes: Within-individual estimates. Model I: Adjusted for age and calendar month; Model II: Further adjusted for single status, low educational attainment, frequent residential relocations, low family income, residence in deprived neighbourhoods and being the recipient of unemployment, social assistance or disability pension benefits.
